# Supplementary material for: Cannabinoid type 2 receptor inhibition enhances the antidepressant and proneurogenic effects of physical exercise after chronic stress
Source: PubMed Central journal article supplement (PMC10981758; doi:10.1038/s41398-024-02877-0), 2024-03-30

## Granular expression

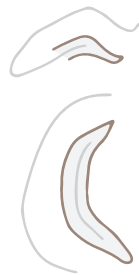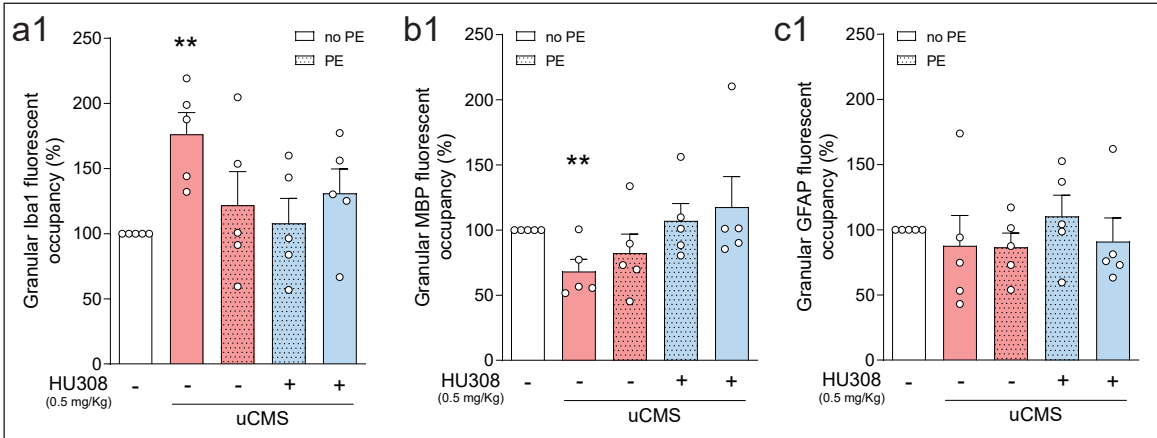

## Hilar expression

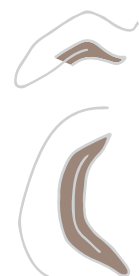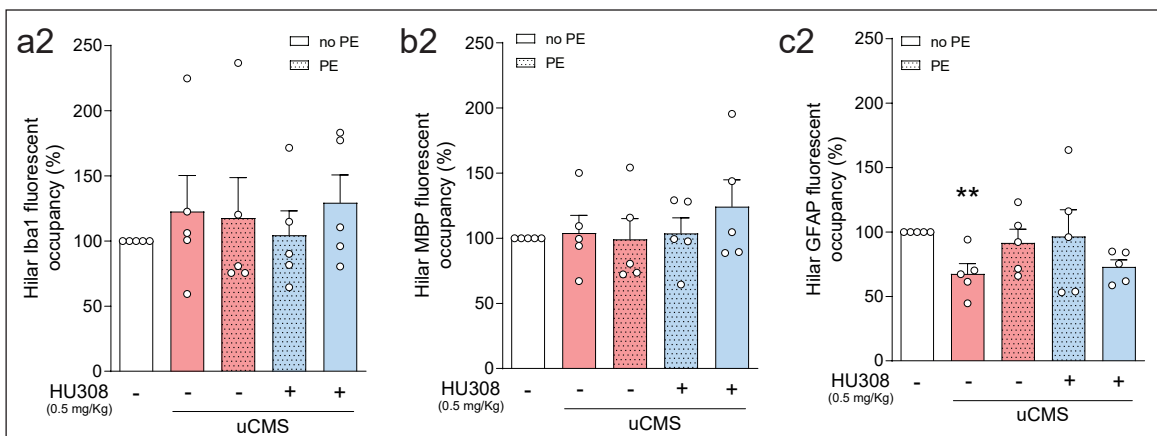

## d

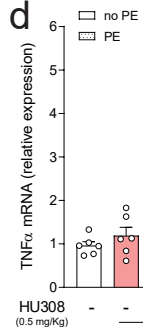

## e

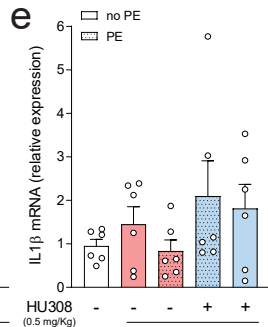

## f

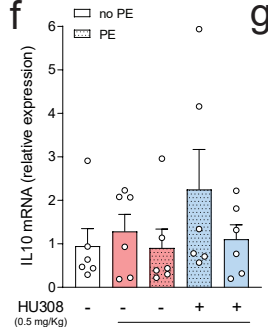

## g

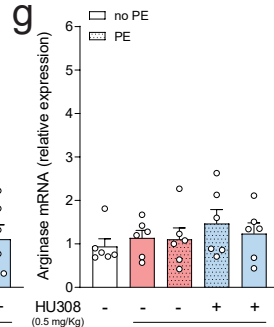

## h

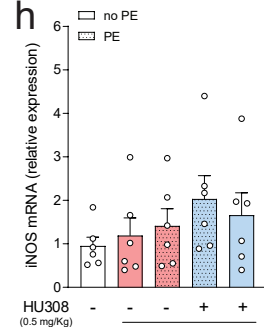

Supplement: 41398_2024_2877_MOESM5_ESM.pdf [file 41398_2024_2877_MOESM5_ESM.pdf]
