# Supplementary material for: Cannabinoid type 2 receptor inhibition enhances the antidepressant and proneurogenic effects of physical exercise after chronic stress
Source: PubMed Central journal article supplement (PMC10981758; doi:10.1038/s41398-024-02877-0), 2024-03-30

**a1**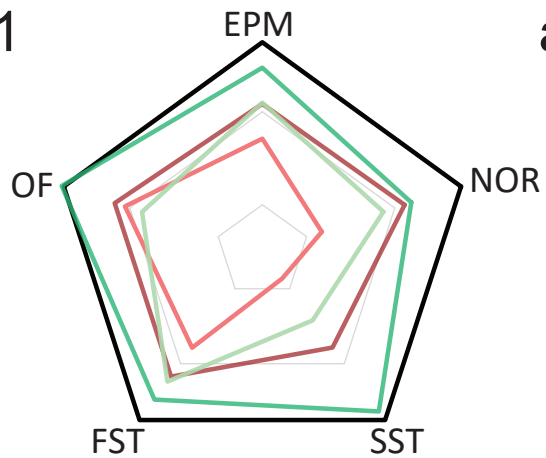**a2**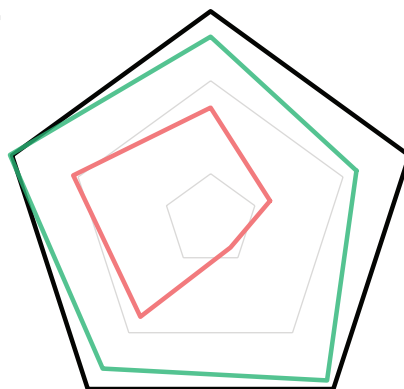**b1**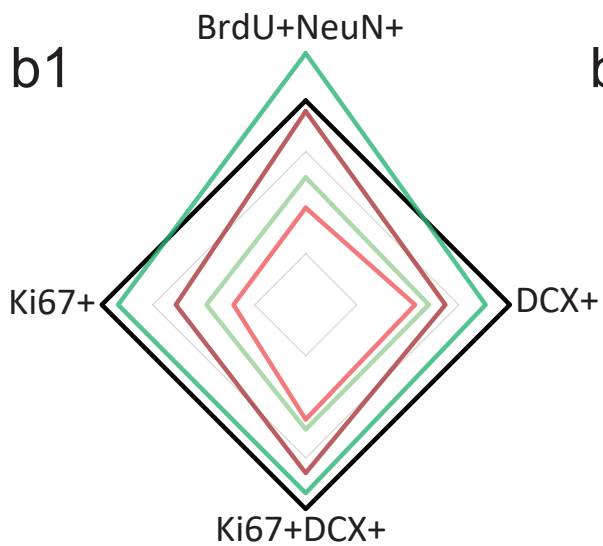**b2**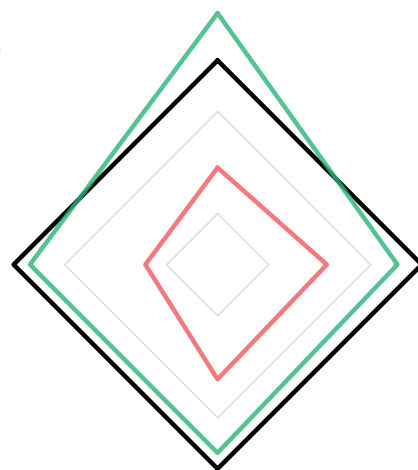**c1**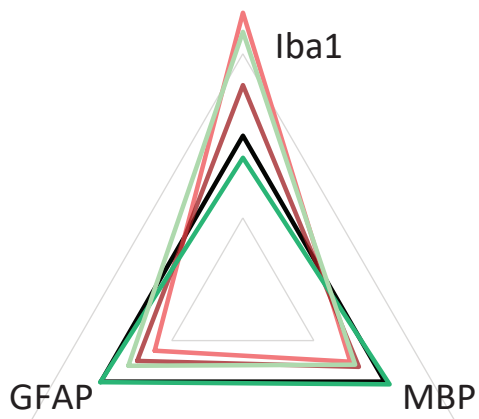**c2**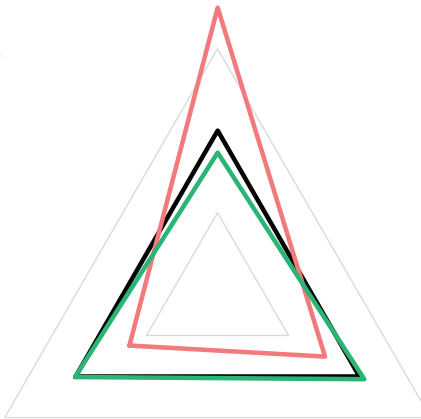

- CTRL
- uCMS
- uCMS+PE
- uCMS+AM
- uCMS+AM+PE

**Behaviour**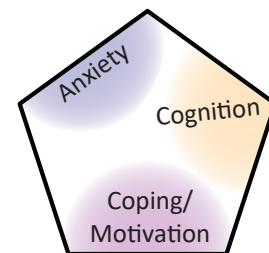**Neurogenesis**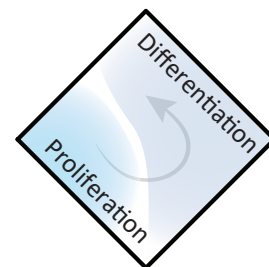**Other cell types**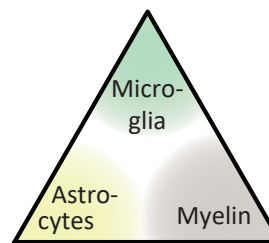

Supplement: 41398_2024_2877_MOESM6_ESM.pdf [file 41398_2024_2877_MOESM6_ESM.pdf]
